# Supplementary material for: Oxygen deficient, carbon coated self-organized TiO2 nanotubes as anode material for Li-ion intercalation
Source: Royal Society of Chemistry journal article supplement (doi:10.1039/c5ta03621f), 2015-01-01
Supplement: c5ta03621f1.pdf [file c5ta03621f1.pdf]

## Supporting Information

### Oxygen deficient, carbon coated self-organized $\text{TiO}_2$ NT as anode material for Li-ion intercalation

*J. Brumbarov, J.P. Vivek, S. Leonardi, C. Valero-Vidal, E. Portenkirchner\*, and J. Kunze-Liebhäuser*

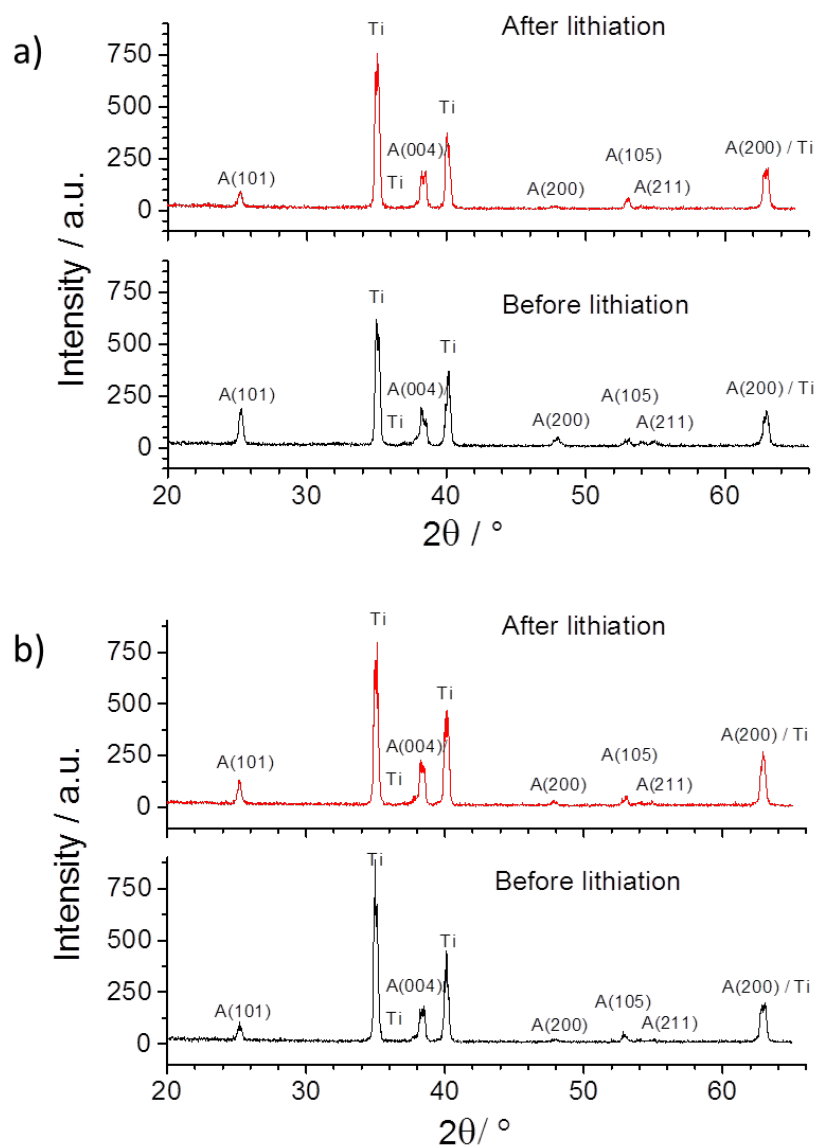

**Figure S1.** XRD spectra for  $\text{TiO}_x$  (a) and  $\text{TiO}_{2-x}\text{-C}$  (b) NT before and after Li-intercalation showing the anatase  $\text{TiO}_2$  structure of the annealed NT.

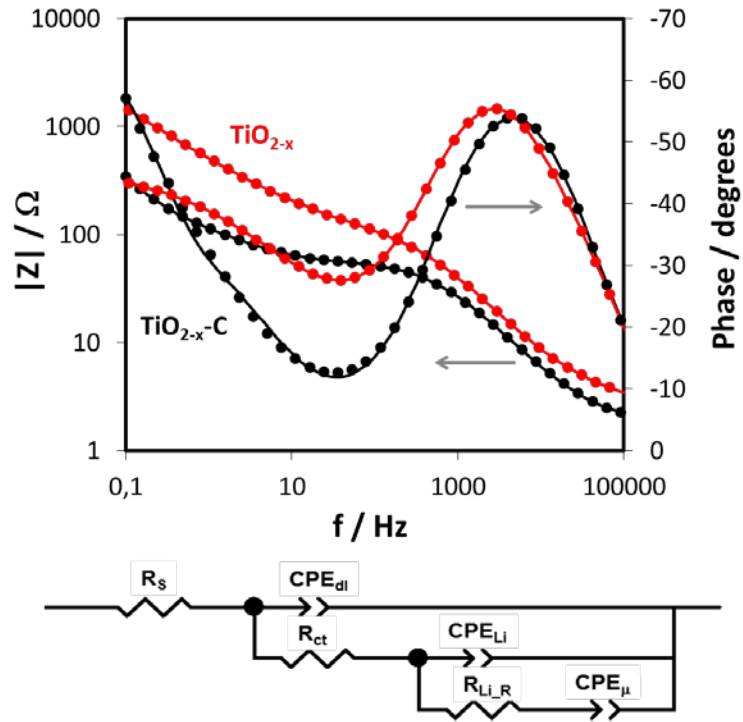

**Figure S2.** Bode plots from EIS data for  $\text{TiO}_{2-x}$  and  $\text{TiO}_{2-x}\text{-C}$  NT and the corresponding equivalent circuit where  $R_s$  is the solution resistance,  $R_{ct}$  is the charge transfer resistance,  $\text{CPE}_{dl}$  is related to the double layer capacitance,  $\text{CPE}_{\mu}$  is related to the chemical capacitance,  $R_{Li}$  is the lithiation-reaction resistance and  $\text{CPE}_{Li}$  relates to the Li capacitance contribution of inserted  $\text{Li}^+$  ions before the lithiation reaction is accomplished.

**Table S1.** Fit parameters and mean square deviation ( $X^2$ ) as extracted from the equivalent circuit shown in Figure 3 (b) in the main text.

|                        | TiO <sub>2-x</sub> | TiO <sub>2-x</sub> -C |
|------------------------|--------------------|-----------------------|
| $R_s / \Omega$         | 3                  | 2                     |
| $R_{ct} / \Omega$      | 104                | 54                    |
| $C_{dl} / \mu\text{F}$ | 1.19               | 2.33                  |
| $C_{Li} / \text{mF}$   | 1.64               | 1.93                  |
| $R_{Li} / \Omega$      | 100                | 180                   |
| $C_\mu / \text{mF}$    | 0.88               | 2.13                  |
| $X^2$                  | 0.00284            | 0.01078               |

$R_s$  is the solution resistance,  $R_{ct}$  is the charge transfer resistance,  $C_{dl}$  is the double layer capacitance,  $C_\mu$  is the chemical capacitance,  $R_{Li}$  is the lithiation-reaction resistance and  $C_{Li}$  corresponds to the Li capacitance contribution of inserted  $\text{Li}^+$  ions before the lithiation reaction is accomplished.

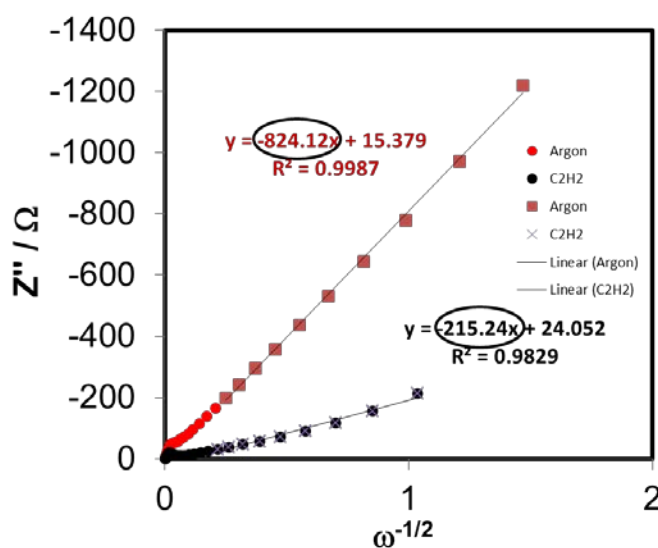

**Figure S3.** Determination of the Warburg factor with 824 for TiO<sub>2-x</sub> and 215 for TiO<sub>2-x</sub>-C NT), indicating that the effective chemical diffusion coefficient of Li increases upon C<sub>2</sub>H<sub>2</sub> annealing.
